# Supplementary material for: Dithiaethyneazuliporphyrin - a contracted heterocarbaporphyrin
Source: Royal Society of Chemistry journal article supplement (doi:10.1039/b605984h), 2006-01-01
Supplement: b605984h.pdf [file b605984h.pdf]

## Supplementary Information for

### Dithiaethyneazuliporphyrin – A Contracted Heterocarbaporphyrin

Anna Berlicka,<sup>a</sup> Natasza Sprutta<sup>a</sup> and Lechosław Latos-Grażyński<sup>a\*</sup>

<sup>a</sup> Department of Chemistry, University of Wrocław, Wrocław 50 383, F. Joliot-Curie Street 14, Poland.; E-mail:llg@wchuwr.chem.uni.wroc.pl

#### Experimental details and spectral data of **2** and **4**

##### Dithiaethyneazuliporphyrin (S<sub>2</sub>EATPP)H (**2**):

Azulene (44 mg, 0.34 mmol), 1,4-bis(5-(phenylhydroxymethyl)thien-2-yl)-1,4-diphenyl-2-butyne **3** (0.2 g, 0.34 mmol) and freshly distilled CH<sub>2</sub>Cl<sub>2</sub> (150 mL) were placed in a 500-mL flask. Nitrogen was bubbled through the solution for 20 min, then Et<sub>2</sub>O:BF<sub>3</sub> (40 μL, 0.3 mmol) was added and the mixture was stirred in the dark for 1 h under nitrogen. Triethylamine (84 μL, 0.6 mmol) and DDQ (0.54 g, 2.4 mmol) were added and the solution was stirred for 20 min. The solvent was evaporated to dryness. The residue was dissolved in dichloromethane and chromatographed on basic alumina. The first orange-brown fraction was eluted with dichloromethane and subjected to a second chromatography on basic alumina with benzene as an eluant. Recrystallization from CH<sub>2</sub>Cl<sub>2</sub>/CH<sub>3</sub>OH produced **2** (35 mg, 15.4%).

UV-Vis (CHCl<sub>3</sub>): λ<sub>max</sub> (logε) = 402 (4.3), 436 (4.4), 490 (4.5), 515 (4.4), 629 nm (3.7); <sup>1</sup>H NMR (500 MHz, benzene-*d*<sub>6</sub>, 298 K, TMS): δ = 8.14 (d, <sup>3</sup>J(H,H) = 7.8 Hz, 4H; 3,18-*o*-Ph); 8.00, 7.91 (AB, <sup>3</sup>J(H,H) = 5.5 Hz, 4H; 5,16-H, 6,15-H); 7.79 (m, 6H; 10<sup>1</sup>,11<sup>1</sup>-H, 8,13-*o*-Ph); 7.33 (t, <sup>3</sup>J(H,H) = 7.3 Hz, 8H; *m*-Ph); 7.24 (t, <sup>3</sup>J(H,H) = 7.3 Hz, 2H; 8,13-*p*-Ph); 7.18 (2H, 3,18-*p*-Ph); 6.55 (t, <sup>3</sup>J(H,H) = 9.6 Hz, 1H; 10<sup>3</sup>-H); 6.23 (t, <sup>3</sup>J(H,H) = 10.1 Hz, 2H; 10<sup>2</sup>,11<sup>2</sup>-H); 5.57 ppm (s, 1H; 20-H); <sup>13</sup>C NMR (125.77 MHz, benzene-*d*<sub>6</sub>, 298 K): δ = 152.3 (7,14-C), 145.3 (4,17-C), 141.3 (8,13-*i*-Ph), 139.0 (10<sup>3</sup>-C), 138.6 (3,18-*i*-Ph), 136.7 (10<sup>1</sup>,11<sup>1</sup>-C), 132.8 (6,15-C), 132.2 (5,16-C), 131.7 (8,13-*o*-Ph), 131.4 (10,11-C), 129.6 (3,18-*o*-Ph), 129.4 (9,12-C), 128.9 (3,18-*m*-Ph), 128.5 (8,13-*m*-Ph), 127.2 (8,13-*p*-Ph), 126.8 (3,18-*p*-Ph, 8,13-C), 126.5 (10<sup>2</sup>,11<sup>2</sup>-C), 120.2 (20-C), 112.0 (3,18-C), 106.1 ppm (1,2-C); HR-MS (ESI, *m/z*): 670.1790 (670.1789 calculated for [C<sub>48</sub>H<sub>30</sub>S<sub>2</sub>]<sup>+</sup>).

##### Ruthenium(II) dithiaethyneazuliporphyrin (S<sub>2</sub>EATPP)Ru<sup>II</sup>(CO)<sub>2</sub>Cl (**4**):

15 mg of **2** (0.022 mmol) and 1.1 g of Ru<sub>3</sub>(CO)<sub>12</sub> (1.76 mmol) in 20 mL of freshly distilled chlorobenzene were refluxed for 4 h under nitrogen. The solvent was evaporated to dryness and the residue was chromatographed on silica gel. After an initial orange-red fraction was eluted with benzene, the second brown-green fraction eluted with dichloromethane was

collected and identified as **4**. The second chromatography on silica gel with dichloromethane as eluant and recrystallization from CHCl<sub>3</sub>/hexane gave **4** in 5.5% yield (1 mg).

UV-Vis (CHCl<sub>3</sub>):  $\lambda_{\max}$  = 373, 474, 508, 644, 693 nm; <sup>1</sup>H NMR (500 MHz, CD<sub>2</sub>Cl<sub>2</sub>, 220 K, TMS):  $\delta$  = 8.53, 8.50 (AB, <sup>3</sup>*J*(H,H) = 5.5 Hz, 4H; 5,16-H, 6,15-H); 8.36 (d, <sup>3</sup>*J*(H,H) = 7.3 Hz, 2H; 8,13-*o*-Ph); 8.02 (d, <sup>3</sup>*J*(H,H) = 7.3 Hz, 4H; 3,18-*o*-Ph); 7.87 (t, <sup>3</sup>*J*(H,H) = 7.3 Hz, 2H; 8,13-*m*-Ph); 7.74 – 7.64 (m, 8H; 10<sup>1</sup>,11<sup>1</sup>-H, 3,18-*m*-Ph, 8,13-*p*-Ph); 7.62 – 7.48 (m, 7H; 10<sup>3</sup>-H, 3,18-*p*-Ph, 8,13-*o,m*-Ph); 7.15 ppm (t, <sup>3</sup>*J*(H,H) = 9.6 Hz, 2H; 10<sup>2</sup>,11<sup>2</sup>-H); MS (ESI, *m/z*): 827.5 (827.0 calculated for [C<sub>50</sub>H<sub>29</sub>O<sub>2</sub>S<sub>2</sub>Ru]<sup>+</sup>).
